# Supplementary material
Source: publisher figshare collection journal article supplement (https://gsajournals.figshare.com/ndownloader/files/25364669)
Supplement: Supplementary file 1 [file 25364669]

## Sheet: Supplementary Table1
Mutant	Upstream	Downstream	Intergenic	Intronic	5'UTR	3'UTR	Exonic	Frameshift indels	Non-frameshift indels	Non-synonymous SNV	Synonymous SNV	Stop-gain	Total
TWF1033	1	3	6	1	0	0	0	0	0	0	0	0	11
TWF1034	1	2	5	2	0	0	0	0	0	0	0	0	10
TWF1035	4	4	7	4	1	0	3	1	0	2	0	0	23
TWF1036	5	8	9	2	2	4	8	1	0	6	1	0	38
TWF1037	10	6	28	5	9	7	24	0	0	18	6	0	89
TWF1038	5	6	8	7	2	2	12	0	0	6	5	1	42
TWF1039	2	5	10	0	2	1	10	0	0	7	3	0	30
TWF1040	5	7	5	1	2	1	10	0	0	7	3	0	31
TWF1041	3	5	9	4	4	1	17	1	0	12	4	1	43
TWF1042	13	3	15	8	4	0	26	3	0	14	9	0	69
TWF1043	6	7	11	10	2	2	12	0	0	6	5	1	50
TWF1044	5	2	6	7	4	2	3	0	0	2	1	0	29
TWF1046	14	3	12	11	9	5	26	2	0	9	12	3	80
TWF1073	28	6	4	6	14	4	22	9	3	4	1	5	84

## Sheet: Supplementary Table2
Mutant	Gene	Chr	Start	End	Ref	Alt	Exonic Func.	GO terms
TWF1035	EYR41_000049	scaffold_1	149046	149046	-	TCTGTAA	frameshift insertion	Creatinase/aminopeptidase-like
TWF1036	EYR41_003391	scaffold_2	2818724	2818724	A	G	nonsynonymous SNV	Major facilitator, sugar transporter-like
TWF1036	EYR41_009094	scaffold_6	793179	793179	T	A	nonsynonymous SNV	Zinc finger, CCCH-type superfamily
TWF1037	EYR41_002645	scaffold_2	399109	399109	T	A	nonsynonymous SNV	F-box-like domain superfamily
TWF1037	EYR41_008023	scaffold_5	1235392	1235392	T	A	nonsynonymous SNV	Protein kinase domain
TWF1038	EYR41_005196	scaffold_3	1505468	1505468	-	TA	stop-gain	MFS transporter superfamily
TWF1038	EYR41_011609	scaffold_8	2469219	2469219	T	A	nonsynonymous SNV	Cytochrome P450, E-class, group I
TWF1039	EYR41_008594	scaffold_5	3072546	3072546	G	A	nonsynonymous SNV	Zinc finger, GATA-type;zinc finger, GATA-type
TWF1041	EYR41_005971	scaffold_3	3955532	3955532	A	T	stop-gain	Copper amine oxidase, catalytic domain
TWF1042	EYR41_001410	scaffold_1	4520093	4520093	-	TTCCGACGAATTT	frameshift insertion	YAP-binding/ALF4/Glomulin
TWF1042	EYR41_005093	scaffold_3	1186858	1186858	-	T	frameshift insertion	Protein kinase domain
TWF1042	EYR41_008629	scaffold_5	3181771	3181771	T	-	frameshift deletion	Protein of unknown function DUF4246
TWF1043	EYR41_005196	scaffold_3	1505468	1505468	-	TA	stop-gain	MFS transporter superfamily
TWF1046	EYR41_003064	scaffold_2	1780257	1780257	A	C	stop-gain	Velvet domain
TWF1046	EYR41_010493	scaffold_7	1849994	1849994	A	T	nonsynonymous SNV	Domain of unknown function DUF2183

## Sheet: Supplementary Table3
Mutant	Gene	Chromosome	Start	End	Reference TWF154	Alternative	Exonic Function	Nucleotide change	Amino acid change	GO terms analyses
TWF1035	EYR41_009390	scaffold_6	1853583	1853583	A	T	nonsynonymous SNV	c.T1899A	p.D633E	Phox homologous domain;AH/BAR domain superfamily;Phox homologous domain;PX domain superfamily;PX domain superfamily;PX domain superfamily;PX domain superfamily;PX domain superfamily;PX domain superfamily;PX domain superfamily;Sorting nexin-8/Mvp1;Sorting nexin-like;Phox homologous domain;Phox homologous domain;SNX8/Mvp1, PX domain;PX domain superfamily
TWF1035	EYR41_000049	scaffold_1	149046	149046	-	TCTGTAA	frameshift insertion	c.2506_2507insTTACAGA	p.K836fs	Creatinase/aminopeptidase-like;Creatinase/aminopeptidase-like;Creatinase/aminopeptidase-like;P-type ATPase;P-type ATPase, subfamily V;P-type ATPase, subfamily V;P-type ATPase, subfamily V;P-type ATPase, cytoplasmic domain N;P-type ATPase, cytoplasmic domain N;HAD superfamily;HAD superfamily;HAD superfamily;HAD superfamily;P-type ATPase, phosphorylation site;P-type ATPase, phosphorylation site;P-t…
TWF1035	EYR41_011417	scaffold_8	1792630	1792630	A	T	nonsynonymous SNV	c.A347T	p.Q116L	HAD-like superfamily;HAD-like superfamily;S-adenosylmethionine decarboxylase;S-adenosylmethionine decarboxylase;S-adenosylmethionine decarboxylase;S-adenosylmethionine decarboxylase;S-adenosylmethionine decarboxylase, conserved site;S-adenosylmethionine decarboxylase, core
TWF1036	EYR41_005733	scaffold_3	3207094	3207094	-	T	frameshift insertion	c.768dupA	p.R257fs	no IPS match
TWF1036	EYR41_002146	scaffold_1	7103695	7103695	A	T	nonsynonymous SNV	c.A12211T	p.N4071Y	Oxoglutarate/iron-dependent dioxygenase;Oxoglutarate/iron-dependent dioxygenase;Oxoglutarate/iron-dependent dioxygenase;Oxoglutarate/iron-dependent dioxygenase;Oxoglutarate/iron-dependent dioxygenase;Oxoglutarate/iron-dependent dioxygenase;Oxoglutarate/iron-dependent dioxygenase;Oxoglutarate/iron-dependent dioxygenase;Oxoglutarate/iron-dependent dioxygenase;Oxoglutarate/iron-dependent dioxygenase…
TWF1036	EYR41_003391	scaffold_2	2818724	2818724	A	G	nonsynonymous SNV	c.A724G	p.S242G	Major facilitator, sugar transporter-like;Major facilitator, sugar transporter-like;Major facilitator, sugar transporter-like;Major facilitator, sugar transporter-like;Major facilitator, sugar transporter-like;Major facilitator, sugar transporter-like;Major facilitator, sugar transporter-like;Major facilitator, sugar transporter-like;Major facilitator, sugar transporter-like;Major facilitator, su…
TWF1036	EYR41_005623	scaffold_3	2869655	2869655	A	G	nonsynonymous SNV	c.T617C	p.L206S	Glyoxalase/fosfomycin resistance/dioxygenase domain;Glyoxalase/Bleomycin resistance protein/Dihydroxybiphenyl dioxygenase;Glyoxalase/Bleomycin resistance protein/Dihydroxybiphenyl dioxygenase;Glyoxalase/Bleomycin resistance protein/Dihydroxybiphenyl dioxygenase;Glyoxalase/Bleomycin resistance protein/Dihydroxybiphenyl dioxygenase;Glyoxalase/Bleomycin resistance protein/Dihydroxybiphenyl dioxygena…
TWF1036	EYR41_007317	scaffold_4	2777221	2777221	C	T	nonsynonymous SNV	c.G3850A	p.G1284R	Tetratricopeptide repeat;NB-ARC;Tetratricopeptide-like helical domain superfamily;Tetratricopeptide-like helical domain superfamily;Tetratricopeptide-like helical domain superfamily;Tetratricopeptide-like helical domain superfamily;Tetratricopeptide-like helical domain superfamily;Tetratricopeptide-like helical domain superfamily;Tetratricopeptide-like helical domain superfamily;Tetratricopeptide…
TWF1036	EYR41_009094	scaffold_6	793179	793179	T	A	nonsynonymous SNV	c.T1798A	p.F600I	zinc finger, CCCH-type superfamily;Heat shock protein 70 family;Heat shock protein 70 family;Heat shock protein 70 family;Heat shock protein 70 family;Heat shock protein 70 family;Heat shock protein 70 family;Heat shock protein 70 family
TWF1036	EYR41_011684	scaffold_8	2739011	2739011	T	C	nonsynonymous SNV	c.A761G	p.K254R	JmjC domain;JmjC domain;JmjC domain;JmjC domain;JmjC domain;JmjC domain;JmjC domain;JmjC domain
TWF1037	EYR41_000441	scaffold_1	1400289	1400289	T	C	nonsynonymous SNV	c.T1676C	p.L559P	snf7 family;N-acetylglutamate synthase, fungal;Vertebrate-like NAGS Gcn5-related N-acetyltransferase (GNAT) domain;Vertebrate-like NAGS Gcn5-related N-acetyltransferase (GNAT) domain;Vertebrate-like NAGS Gcn5-related N-acetyltransferase (GNAT) domain;Vertebrate-like NAGS Gcn5-related N-acetyltransferase (GNAT) domain;Vertebrate-like NAGS Gcn5-related N-acetyltransferase (GNAT) domain
TWF1037	EYR41_001096	scaffold_1	3505840	3505840	A	T	nonsynonymous SNV	c.T57A	p.D19E	Cupredoxin;Cupredoxin;Cupredoxin;Cupredoxin;Cupredoxin;Cupredoxin;Cupredoxin;Cupredoxin;Cupredoxin;Cupredoxin;Cupredoxin
TWF1037	EYR41_002053	scaffold_1	6778769	6778769	C	G	nonsynonymous SNV	c.C1100G	p.P367R	C:nucleus; P:mitotic spindle assembly checkpoint
TWF1037	EYR41_002645	scaffold_2	399109	399109	T	A	nonsynonymous SNV	c.A1160T	p.Y387F	F-box-like domain superfamily;F-box-like domain superfamily;F-box-like domain superfamily;F-box-like domain superfamily;F-box-like domain superfamily;F-box-like domain superfamily;F-box-like domain superfamily;F-box-like domain superfamily;F-box-like domain superfamily;F-box-like domain superfamily;F-box-like domain superfamily
TWF1037	EYR41_002899	scaffold_2	1223975	1223975	C	T	nonsynonymous SNV	c.G311A	p.R104K	signal transduction histidine kinase, dimerisation/phosphoacceptor domain superfamily;signal transduction histidine kinase, dimerisation/phosphoacceptor domain superfamily;signal transduction histidine kinase, dimerisation/phosphoacceptor domain superfamily;signal transduction histidine kinase, dimerisation/phosphoacceptor domain superfamily;signal transduction histidine kinase, dimerisation/phos…
TWF1037	EYR41_004952	scaffold_3	693446	693446	T	C	nonsynonymous SNV	c.A1727G	p.K576R	Clr5 domain;Clr5 domain;Clr5 domain;Clr5 domain;Clr5 domain
TWF1037	EYR41_005606	scaffold_3	2810879	2810879	T	G	nonsynonymous SNV	c.T99G	p.I33M	no GO terms
TWF1037	EYR41_006504	scaffold_4	254215	254215	A	C	nonsynonymous SNV	c.A166C	p.K56Q	Domain of unknown function DUF2040;Domain of unknown function DUF2040;Domain of unknown function DUF2040;Homeobox-like domain superfamily
TWF1037	EYR41_007991	scaffold_5	1132526	1132526	C	T	nonsynonymous SNV	c.C416T	p.T139I	Aldolase-type TIM barrel;pyruvate carboxyltransferase;pyruvate carboxyltransferase;pyruvate carboxyltransferase;pyruvate carboxyltransferase;Hydroxymethylglutaryl-CoA lyase;Hydroxymethylglutaryl-CoA lyase, active site;pyruvate carboxyltransferase;pyruvate carboxyltransferase;pyruvate carboxyltransferase;pyruvate carboxyltransferase
TWF1037	EYR41_008023	scaffold_5	1235392	1235392	T	A	nonsynonymous SNV	c.T1569A	p.D523E,EYR41_008023	Protein kinase domain;Ankyrin repeat;Ankyrin repeat;Ankyrin repeat;Protein kinase domain;Protein kinase domain;Serine/threonine-protein kinase, active site;Protein kinase, ATP binding site;Ankyrin repeat-containing domain;Protein kinase domain;Ankyrin repeat-containing domain;Ankyrin repeat-containing domain superfamily;Protein kinase-like domain superfamily
TWF1037	EYR41_008555	scaffold_5	2959037	2959037	A	G	nonsynonymous SNV	c.A1223G	p.Y408C	P-loop containing nucleoside triphosphate hydrolase;P-loop containing nucleoside triphosphate hydrolase;P-loop containing nucleoside triphosphate hydrolase;P-loop containing nucleoside triphosphate hydrolase;P-loop containing nucleoside triphosphate hydrolase;P-loop containing nucleoside triphosphate hydrolase
TWF1037	EYR41_009758	scaffold_6	3004683	3004683	C	T	nonsynonymous SNV	c.C1639T	p.P547S	Peroxisome assembly protein 12;Peroxisome assembly protein 12;Peroxisome assembly protein 12;Peroxisome assembly protein 12;Peroxisome assembly protein 12
TWF1037	EYR41_010229	scaffold_7	837797	837797	A	T	nonsynonymous SNV	c.A1159T	p.M387L	SKP1/BTB/POZ domain superfamily;SKP1/BTB/POZ domain superfamily;RAD3/XPD family;Helicase-like, DEXD box c2 type;ATP-dependent helicase, C-terminal;ATP-dependent helicase, C-terminal;ATP-dependent helicase, C-terminal;Helical and beta-bridge domain;DEAD2;ATP-dependent helicase, C-terminal;ATP-dependent helicase Rad3/Chl1-like;ATP-dependent helicase Rad3/Chl1-like;RAD3/XPD family;Helicase superfami…
TWF1037	EYR41_010393	scaffold_7	1510039	1510039	A	G	nonsynonymous SNV	c.T695C	p.F232S	F:nucleic acid binding; P:mRNA processing; F:metal ion binding
TWF1037	EYR41_011219	scaffold_8	1155962	1155962	C	T	nonsynonymous SNV	c.C955T	p.P319S	Phosphatidylinositol-specific phospholipase C, X domain;PLC-like phosphodiesterase, TIM beta/alpha-barrel domain superfamily;Phosphatidylinositol-specific phospholipase C, X domain;Phosphatidylinositol-specific phospholipase C, X domain;Phosphatidylinositol-specific phospholipase C, X domain;Phosphatidylinositol-specific phospholipase C, X domain;Phosphatidylinositol-specific phospholipase C, X d…
TWF1037	EYR41_011413	scaffold_8	1782404	1782404	G	A	nonsynonymous SNV	c.G302A	p.G101E	C:nucleus; P:transcription initiation from RNA polymerase II promoter; F:protein heterodimerization activity
TWF1038	EYR41_005196	scaffold_3	1505468	1505468	-	TA	stopgain	c.3945_3946insTA	p.G1316_L1317delinsX	MFS transporter superfamily;MFS transporter superfamily;Protein of unknown function DUF3645;Protein of unknown function DUF3638;Protein of unknown function DUF3638;Protein of unknown function DUF3638;Protein of unknown function DUF3638;Protein of unknown function DUF3638;Protein of unknown function DUF3638;Protein of unknown function DUF3638
TWF1038	EYR41_002557	scaffold_2	155075	155075	A	T	nonsynonymous SNV	c.T1086A	p.N362K	no GO terms
TWF1038	EYR41_003196	scaffold_2	2185677	2185677	T	C	nonsynonymous SNV	c.T1256C	p.L419S	HD/PDEase domain;HD/PDEase domain;ribosomal RNA methyltransferase, Spb1, C-terminal;ribosomal RNA methyltransferase, Spb1, C-terminal;ribosomal RNA methyltransferase FtsJ domain;ribosomal RNA methyltransferase Spb1, domain of unknown function DUF3381;ribosomal RNA methyltransferase Spb1, domain of unknown function DUF3381;ribosomal RNA methyltransferase Spb1, domain of unknown function DUF3381;ri…
TWF1038	EYR41_004561	scaffold_2	6579914	6579914	T	C	nonsynonymous SNV	c.A272G	p.Y91C	nucleoside phosphorylase domain;nucleoside phosphorylase domain;nucleoside phosphorylase domain;nucleoside phosphorylase domain;nucleoside phosphorylase domain;nucleoside phosphorylase domain;nucleoside phosphorylase domain;nucleoside phosphorylase domain;nucleoside phosphorylase superfamily
TWF1038	EYR41_005073	scaffold_3	1125098	1125098	T	C	nonsynonymous SNV	c.T1954C	p.S652P	Alkaline phosphatase-like, alpha/beta/alpha;Type I phosphodiesterase/nucleotide pyrophosphatase/phosphate transferase;Type I phosphodiesterase/nucleotide pyrophosphatase/phosphate transferase;GPI ethanolamine phosphate transferase 3;GPI ethanolamine phosphate transferase 3;GPI ethanolamine phosphate transferase 3;GPI ethanolamine phosphate transferase 3;GPI ethanolamine phosphate transferase 3;GP…
TWF1038	EYR41_005513	scaffold_3	2556773	2556773	T	C	nonsynonymous SNV	c.A875G	p.Q292R	Complex 1 LYR protein;Complex 1 LYR protein;proteasome component (PCI) domain;proteasome component (PCI) domain;proteasome component (PCI) domain;Winged helix-like DNA-binding domain superfamily;Eukaryotic translation initiation factor 3 subunit C, N-terminal domain;Eukaryotic translation initiation factor 3 subunit C, N-terminal domain;Eukaryotic translation initiation factor 3 subunit C, N-term…
TWF1038	EYR41_011609	scaffold_8	2469219	2469219	T	A	nonsynonymous SNV	c.A1379T	p.N460I	Cytochrome P450, E-class, group I;Cytochrome P450 superfamily;Cytochrome P450;Cytochrome P450;Cytochrome P450;Cytochrome P450, conserved site;Cytochrome P450, conserved site;Cytochrome P450, conserved site;Cytochrome P450, conserved site;Cytochrome P450, conserved site;Cytochrome P450, conserved site;Cytochrome P450 superfamily
TWF1039	EYR41_004066	scaffold_2	5015631	5015631	A	T	nonsynonymous SNV	c.A10672T	p.N3558Y	P-loop containing nucleoside triphosphate hydrolase;P-loop containing nucleoside triphosphate hydrolase;P-loop containing nucleoside triphosphate hydrolase;P-loop containing nucleoside triphosphate hydrolase;P-loop containing nucleoside triphosphate hydrolase;P-loop containing nucleoside triphosphate hydrolase;P-loop containing nucleoside triphosphate hydrolase;AAA+ ATPase domain;AAA+ ATPase doma…
TWF1039	EYR41_007558	scaffold_4	3581080	3581080	A	G	nonsynonymous SNV	c.T349C	p.W117R	Protein of unknown function DUF1770, fungi;Aminoglycoside phosphotransferase;Aminoglycoside phosphotransferase;Aminoglycoside phosphotransferase;Protein kinase-like domain superfamily
TWF1039	EYR41_008594	scaffold_5	3072546	3072546	G	A	nonsynonymous SNV	c.C179T	p.T60I	zinc finger, GATA-type;zinc finger, GATA-type;zinc finger, GATA-type;zinc finger, GATA-type;zinc finger, GATA-type;zinc finger, GATA-type;zinc finger, GATA-type;zinc finger, GATA-type
TWF1039	EYR41_008594	scaffold_5	3072547	3072547	T	A	nonsynonymous SNV	c.A178T	p.T60S	zinc finger, GATA-type;zinc finger, GATA-type;zinc finger, GATA-type;zinc finger, GATA-type;zinc finger, GATA-type;zinc finger, GATA-type;zinc finger, GATA-type;zinc finger, GATA-type
TWF1039	EYR41_009224	scaffold_6	1178797	1178797	G	A	nonsynonymous SNV	c.C623T	p.P208L	Protein kinase-like domain superfamily;Domain of unknown function DUF1747;Domain of unknown function DUF1747;PH-like domain superfamily;PH-like domain superfamily;PH-like domain superfamily;PH-like domain superfamily;PH-like domain superfamily;PH-like domain superfamily;PH-like domain superfamily;PH-like domain superfamily
TWF1039	EYR41_009584	scaffold_6	2450141	2450141	T	C	nonsynonymous SNV	c.A325G	p.K109E	NO signalling/Golgi transport ligand-binding domain superfamily;NO signalling/Golgi transport ligand-binding domain superfamily;NO signalling/Golgi transport ligand-binding domain superfamily;NO signalling/Golgi transport ligand-binding domain superfamily;NO signalling/Golgi transport ligand-binding domain superfamily;NO signalling/Golgi transport ligand-binding domain superfamily;NO signalling/G…
TWF1039	EYR41_011496	scaffold_8	2138295	2138295	A	C	nonsynonymous SNV	c.A700C	p.K234Q	zinc finger, CCCH-type superfamily;RNA helicase UPF1, UPF2-interacting domain;RNA helicase UPF1, UPF2-interacting domain;RNA helicase UPF1, UPF2-interacting domain;RNA helicase UPF1, UPF2-interacting domain;RNA helicase UPF1, UPF2-interacting domain;RNA helicase UPF1, UPF2-interacting domain;RNA helicase UPF1, UPF2-interacting domain;RNA helicase UPF1, UPF2-interacting domain;RNA helicase UPF1, U…
TWF1040	EYR41_004066	scaffold_2	5015631	5015631	A	T	nonsynonymous SNV	c.A10672T	p.N3558Y	P-loop containing nucleoside triphosphate hydrolase;P-loop containing nucleoside triphosphate hydrolase;P-loop containing nucleoside triphosphate hydrolase;P-loop containing nucleoside triphosphate hydrolase;P-loop containing nucleoside triphosphate hydrolase;P-loop containing nucleoside triphosphate hydrolase;P-loop containing nucleoside triphosphate hydrolase;AAA+ ATPase domain;AAA+ ATPase doma…
TWF1040	EYR41_007558	scaffold_4	3581080	3581080	A	G	nonsynonymous SNV	c.T349C	p.W117R	Protein of unknown function DUF1770, fungi;Aminoglycoside phosphotransferase;Aminoglycoside phosphotransferase;Aminoglycoside phosphotransferase;Protein kinase-like domain superfamily
TWF1040	EYR41_008594	scaffold_5	3072546	3072546	G	A	nonsynonymous SNV	c.C179T	p.T60I	zinc finger, GATA-type;zinc finger, GATA-type;zinc finger, GATA-type;zinc finger, GATA-type;zinc finger, GATA-type;zinc finger, GATA-type;zinc finger, GATA-type;zinc finger, GATA-type
TWF1040	EYR41_008594	scaffold_5	3072547	3072547	T	A	nonsynonymous SNV	c.A178T	p.T60S	zinc finger, GATA-type;zinc finger, GATA-type;zinc finger, GATA-type;zinc finger, GATA-type;zinc finger, GATA-type;zinc finger, GATA-type;zinc finger, GATA-type;zinc finger, GATA-type
TWF1040	EYR41_009224	scaffold_6	1178797	1178797	G	A	nonsynonymous SNV	c.C623T	p.P208L	Protein kinase-like domain superfamily;Domain of unknown function DUF1747;Domain of unknown function DUF1747;PH-like domain superfamily;PH-like domain superfamily;PH-like domain superfamily;PH-like domain superfamily;PH-like domain superfamily;PH-like domain superfamily;PH-like domain superfamily;PH-like domain superfamily
TWF1040	EYR41_009584	scaffold_6	2450141	2450141	T	C	nonsynonymous SNV	c.A325G	p.K109E	NO signalling/Golgi transport ligand-binding domain superfamily;NO signalling/Golgi transport ligand-binding domain superfamily;NO signalling/Golgi transport ligand-binding domain superfamily;NO signalling/Golgi transport ligand-binding domain superfamily;NO signalling/Golgi transport ligand-binding domain superfamily;NO signalling/Golgi transport ligand-binding domain superfamily;NO signalling/G…
TWF1040	EYR41_011496	scaffold_8	2138295	2138295	A	C	nonsynonymous SNV	c.A700C	p.K234Q	zinc finger, CCCH-type superfamily;RNA helicase UPF1, UPF2-interacting domain;RNA helicase UPF1, UPF2-interacting domain;RNA helicase UPF1, UPF2-interacting domain;RNA helicase UPF1, UPF2-interacting domain;RNA helicase UPF1, UPF2-interacting domain;RNA helicase UPF1, UPF2-interacting domain;RNA helicase UPF1, UPF2-interacting domain;RNA helicase UPF1, UPF2-interacting domain;RNA helicase UPF1, U…
TWF1041	EYR41_000468	scaffold_1	1482969	1482969	T	C	nonsynonymous SNV	c.T23C	p.L8P	Cell division control protein 73, C-terminal domain superfamily;Cell division control protein 73, C-terminal;Cell division control protein 73, C-terminal;Cdc73/Parafibromin
TWF1041	EYR41_001203	scaffold_1	3834020	3834020	G	A	nonsynonymous SNV	c.C560T	p.S187F	Amidase signature (AS) superfamily;Septin-type guanine nucleotide-binding (G) domain;Septin-type guanine nucleotide-binding (G) domain;Septin-type guanine nucleotide-binding (G) domain;Septin-type guanine nucleotide-binding (G) domain;Septin-type guanine nucleotide-binding (G) domain;Septin-type guanine nucleotide-binding (G) domain;Septin-type guanine nucleotide-binding (G) domain;Septin-type gu…
TWF1041	EYR41_001212	scaffold_1	3868941	3868941	T	C	nonsynonymous SNV	c.A845G	p.K282R	Tetratricopeptide-like helical domain superfamily;Protein of unknown function DUF2457;Protein of unknown function DUF2457;Protein of unknown function DUF2457;Protein of unknown function DUF2457;Protein of unknown function DUF2457;Protein of unknown function DUF2457;Protein of unknown function DUF2457;Protein of unknown function DUF2457;Protein of unknown function DUF2457;Protein of unknown functi…
TWF1041	EYR41_003711	scaffold_2	3861925	3861925	C	G	nonsynonymous SNV	c.G2338C	p.V780L	P-loop containing nucleoside triphosphate hydrolase;galactose-binding-like domain superfamily;SUN domain;SUN domain;SUN domain;SUN domain;SUN domain;SUN domain;SUN domain;SUN domain;SUN domain;SUN domain;SUN domain;SUN domain;SUN domain;SUN domain;SUN domain
TWF1041	EYR41_003895	scaffold_2	4422779	4422779	T	C	nonsynonymous SNV	c.T59C	p.F20S	no IPS match
TWF1041	EYR41_005370	scaffold_3	2009538	2009538	A	C	nonsynonymous SNV	c.T873G	p.N291K	Cytochrome P450 superfamily;Cytochrome P450 superfamily;Cytochrome P450 superfamily
TWF1041	EYR41_005971	scaffold_3	3955532	3955532	A	T	stopgain	c.T1106A	p.L369X	Copper amine oxidase, catalytic domain;Copper amine oxidase, N2-terminal;Copper amine oxidase, N2-terminal;Copper amine oxidase, N2-terminal;Copper amine oxidase, catalytic domain superfamily;Copper amine oxidase, catalytic domain superfamily;Copper amine oxidase;Copper amine oxidase;Copper amine oxidase;Copper amine oxidase, catalytic domain superfamily;Copper amine oxidase, N-terminal;Copper am…
TWF1041	EYR41_006616	scaffold_4	591067	591067	G	A	nonsynonymous SNV	c.C1534T	p.L512F	Domain of unknown function DUF2235;Domain of unknown function DUF2235;Domain of unknown function DUF2235;Domain of unknown function DUF2235;Domain of unknown function DUF2235;Domain of unknown function DUF2235;Domain of unknown function DUF2235;Domain of unknown function DUF2235;Domain of unknown function DUF2235;Domain of unknown function DUF2235;Domain of unknown function DUF2235;Domain of unkn…
TWF1041	EYR41_006763	scaffold_4	1046473	1046473	C	T	nonsynonymous SNV	c.G971A	p.G324E	Peptidase S8, subtilisin-related;Peptidase S8/S53 domain;Peptidase S8/S53 domain superfamily;Peptidase S8/S53 domain superfamily;Peptidase S8/S53 domain superfamily;Peptidase S8/S53 domain superfamily;Peptidase S8/S53 domain superfamily;Peptidase S8, subtilisin, Asp-active site;Peptidase S8, subtilisin, Ser-active site;Peptidase S8, subtilisin, Ser-active site;Peptidase S8, subtilisin, Ser-active…
TWF1041	EYR41_008550	scaffold_5	2931465	2931465	A	G	nonsynonymous SNV	c.A853G	p.N285D	signal peptidase complex subunit 2;signal peptidase complex subunit 2;signal peptidase complex subunit 2;signal peptidase complex subunit 2;signal peptidase complex subunit 2
TWF1041	EYR41_009335	scaffold_6	1661130	1661130	T	C	nonsynonymous SNV	c.T1340C	p.L447P	Phospholipid methyltransferase;Phosphatidylethanolamine N-methyltransferase, fungi;Phosphatidylethanolamine N-methyltransferase, fungi;Phosphatidylethanolamine N-methyltransferase, fungi;Phosphatidylethanolamine N-methyltransferase, fungi;Phosphatidylethanolamine N-methyltransferase, fungi;Phosphatidylethanolamine N-methyltransferase, fungi;Phosphatidylethanolamine N-methyltransferase, fungi;Phos…
TWF1041	EYR41_011159	scaffold_8	951467	951467	C	A	nonsynonymous SNV	c.C218A	p.T73N	Alpha/Beta hydrolase fold;Alpha/Beta hydrolase fold;Alpha/Beta hydrolase fold
TWF1041	EYR41_011820	scaffold_9	319238	319238	T	C	nonsynonymous SNV	c.T152C	p.L51P	SKP1/BTB/POZ domain superfamily;SKP1/BTB/POZ domain superfamily;SKP1/BTB/POZ domain superfamily;SKP1/BTB/POZ domain superfamily
TWF1041	EYR41_007677	scaffold_4	3963548	3963548	-	G	frameshift insertion	c.193dupG	p.L64fs	no IPS match
TWF1042	EYR41_001221	scaffold_1	3911456	3911456	A	G	nonsynonymous SNV	c.T698C	p.L233P	Armadillo-type fold;Phosphogluconate dehydrogenase, NAD-binding, putative, C-terminal;6-phosphogluconate dehydrogenase, domain 2;6-phosphogluconate dehydrogenase, domain 2;6-phosphogluconate dehydrogenase, domain 2;6-phosphogluconate dehydrogenase, domain 2;6-phosphogluconate dehydrogenase-like, C-terminal domain superfamily;NAD(P)-binding domain superfamily
TWF1042	EYR41_001578	scaffold_1	5184605	5184605	G	A	nonsynonymous SNV	c.C121T	p.L41F	Molybdenum cofactor carrier, putative;Molybdenum cofactor carrier, putative;Nucleotide-binding alpha-beta plait domain superfamily;ribosomal RNA-processing protein 7;ribosomal RNA-processing protein 7;ribosomal RNA-processing protein 7;ribosomal RNA-processing protein 7;ribosomal RNA-processing protein 7;ribosomal RNA-processing protein 7;ribosomal RNA-processing protein 7
TWF1042	EYR41_001825	scaffold_1	5969621	5969621	A	C	nonsynonymous SNV	c.A124C	p.K42Q	TEA/ATTS domain;TEA/ATTS domain;TEA/ATTS domain;TEA/ATTS domain superfamily;TEA/ATTS domain superfamily;TEA/ATTS domain superfamily;TEA/ATTS domain superfamily;TEA/ATTS domain superfamily;TEA/ATTS domain superfamily;TEA/ATTS domain superfamily;TEA/ATTS domain
TWF1042	EYR41_001829	scaffold_1	5996796	5996796	C	T	nonsynonymous SNV	c.C1967T	p.S656F	F:ubiquitin protein ligase activity; P:ubiquitin-dependent protein catabolic process via the N-end rule pathway
TWF1042	EYR41_003461	scaffold_2	3042332	3042332	A	T	nonsynonymous SNV	c.A1492T	p.I498L	Protein of unknown function DUF1688;Protein of unknown function DUF1688;Protein of unknown function DUF1688;Protein of unknown function DUF1688;Protein of unknown function DUF1688;Protein of unknown function DUF1688
TWF1042	EYR41_003829	scaffold_2	4198919	4198919	G	A	nonsynonymous SNV	c.C118T	p.P40S	Alpha/Beta hydrolase fold;Alpha/Beta hydrolase fold;Alpha/Beta hydrolase fold
TWF1042	EYR41_004140	scaffold_2	5237964	5237964	T	G	nonsynonymous SNV	c.A715C	p.I239L	Dynamin superfamily;Dynamin, GTPase domain;Dynamin superfamily;Dynamin central domain;Dynamin central domain;Dynamin central domain;Dynamin superfamily;GTPase effector domain;Dynamin-type guanine nucleotide-binding (G) domain;Dynamin, GTPase domain;P-loop containing nucleoside triphosphate hydrolase
TWF1042	EYR41_004526	scaffold_2	6465835	6465835	A	G	nonsynonymous SNV	c.A118G	p.R40G	no IPS match
TWF1042	EYR41_005636	scaffold_3	2921989	2921989	T	A	nonsynonymous SNV	c.A377T	p.D126V	Peptidase S8, subtilisin-related;Peptidase S8/S53 domain;Peptidase S8/S53 domain superfamily;Peptidase S8/S53 domain superfamily;Peptidase S8/S53 domain superfamily;Peptidase S8/S53 domain superfamily;Peptidase S8, subtilisin, Ser-active site;Peptidase S8, subtilisin, Ser-active site;Peptidase S8, subtilisin, Ser-active site;Peptidase S8, subtilisin, Ser-active site;Peptidase S8, subtilisin, Ser-…
TWF1042	EYR41_007077	scaffold_4	1955332	1955332	A	G	nonsynonymous SNV	c.T4181C	p.F1394S	Polymerase, nucleotidyl transferase domain;PAP/25A-associated;Histidine phosphatase superfamily;Histidine phosphatase superfamily, clade-2;Histidine phosphatase superfamily, clade-2;Histidine phosphatase superfamily, clade-2;Histidine phosphatase superfamily, clade-2;Histidine phosphatase superfamily, clade-2;Histidine phosphatase superfamily, clade-2;Histidine phosphatase superfamily, clade-2;Hi…
TWF1042	EYR41_007927	scaffold_5	908301	908301	A	G	nonsynonymous SNV	c.T347C	p.F116S	Histidine phosphatase superfamily;NUDIX hydrolase domain;NUDIX hydrolase domain;NUDIX hydrolase domain;NUDIX hydrolase domain;NUDIX hydrolase domain;NUDIX hydrolase, conserved site;NUDIX hydrolase domain;NUDIX hydrolase domain;NUDIX hydrolase-like domain superfamily
TWF1042	EYR41_009675	scaffold_6	2729997	2729997	T	C	nonsynonymous SNV	c.T2951C	p.L984S	Isoleucine-tRNA ligase;Methionyl/Valyl/Leucyl/Isoleucyl-tRNA synthetase, anticodon-binding;Rossmann-like alpha/beta/alpha sandwich fold;Valyl/Leucyl/Isoleucyl-tRNA synthetase, editing domain;Valyl/Leucyl/Isoleucyl-tRNA synthetase, editing domain;Isoleucine-tRNA ligase;Aminoacyl-tRNA synthetase, class Ia;Aminoacyl-tRNA synthetase, class Ia;Aminoacyl-tRNA synthetase, class Ia;Aminoacyl-tRNA synthet…
TWF1042	EYR41_010805	scaffold_7	2887601	2887601	A	T	nonsynonymous SNV	c.A1360T	p.I454F	ribonuclease H superfamily;ribonuclease H domain;ribonuclease H domain;ribonuclease H domain;ribonuclease H domain;ribonuclease H domain;ribonuclease H domain;ribonuclease H-like superfamily
TWF1042	EYR41_011828	scaffold_9	346627	346627	A	C	nonsynonymous SNV	c.A5716C	p.K1906Q	Mitochondrial carrier domain superfamily;Mitochondrial carrier domain superfamily;Mitochondrial carrier domain superfamily;Mitochondrial carrier domain superfamily;Mitochondrial carrier domain superfamily;Mitochondrial carrier domain superfamily;Mitochondrial carrier domain superfamily;Mitochondrial carrier domain superfamily;Mitochondrial carrier domain superfamily;Mitochondrial carrier domain s…
TWF1042	EYR41_001410	scaffold_1	4520093	4520093	-	TTCCGACGAATTT	frameshift insertion	c.1413_1414insTTCCGACGAATTT	p.F471fs	YAP-binding/ALF4/Glomulin;YAP-binding/ALF4/Glomulin;YAP-binding/ALF4/Glomulin;YAP-binding/ALF4/Glomulin;YAP-binding/ALF4/Glomulin
TWF1042	EYR41_005093	scaffold_3	1186858	1186858	-	T	frameshift insertion	c.851dupT	p.I284fs	Protein kinase domain;Protein kinase domain;Protein kinase domain;Protein kinase domain;Protein kinase domain;Protein kinase domain;Protein kinase domain;Protein kinase, ATP binding site;Serine/threonine-protein kinase, active site;Protein kinase domain;Glycogen synthase kinase 3, catalytic domain;Protein kinase-like domain superfamily
TWF1042	EYR41_008629	scaffold_5	3181771	3181771	T	-	frameshift deletion	c.800delA	p.K267fs	Protein of unknown function DUF4246;Protein of unknown function DUF4246;Protein of unknown function DUF4246;Protein of unknown function DUF4246
TWF1043	EYR41_002557	scaffold_2	155075	155075	A	T	nonsynonymous SNV	c.T1086A	p.N362K	no GO terms
TWF1043	EYR41_003196	scaffold_2	2185677	2185677	T	C	nonsynonymous SNV	c.T1256C	p.L419S	HD/PDEase domain;HD/PDEase domain;ribosomal RNA methyltransferase, Spb1, C-terminal;ribosomal RNA methyltransferase, Spb1, C-terminal;ribosomal RNA methyltransferase FtsJ domain;ribosomal RNA methyltransferase Spb1, domain of unknown function DUF3381;ribosomal RNA methyltransferase Spb1, domain of unknown function DUF3381;ribosomal RNA methyltransferase Spb1, domain of unknown function DUF3381;ri…
TWF1043	EYR41_004561	scaffold_2	6579914	6579914	T	C	nonsynonymous SNV	c.A272G	p.Y91C	nucleoside phosphorylase domain;nucleoside phosphorylase domain;nucleoside phosphorylase domain;nucleoside phosphorylase domain;nucleoside phosphorylase domain;nucleoside phosphorylase domain;nucleoside phosphorylase domain;nucleoside phosphorylase domain;nucleoside phosphorylase superfamily
TWF1043	EYR41_005073	scaffold_3	1125098	1125098	T	C	nonsynonymous SNV	c.T1954C	p.S652P	Alkaline phosphatase-like, alpha/beta/alpha;Type I phosphodiesterase/nucleotide pyrophosphatase/phosphate transferase;Type I phosphodiesterase/nucleotide pyrophosphatase/phosphate transferase;GPI ethanolamine phosphate transferase 3;GPI ethanolamine phosphate transferase 3;GPI ethanolamine phosphate transferase 3;GPI ethanolamine phosphate transferase 3;GPI ethanolamine phosphate transferase 3;GP…
TWF1043	EYR41_005513	scaffold_3	2556773	2556773	T	C	nonsynonymous SNV	c.A875G	p.Q292R	Complex 1 LYR protein;Complex 1 LYR protein;proteasome component (PCI) domain;proteasome component (PCI) domain;proteasome component (PCI) domain;Winged helix-like DNA-binding domain superfamily;Eukaryotic translation initiation factor 3 subunit C, N-terminal domain;Eukaryotic translation initiation factor 3 subunit C, N-terminal domain;Eukaryotic translation initiation factor 3 subunit C, N-term…
TWF1043	EYR41_011609	scaffold_8	2469219	2469219	T	A	nonsynonymous SNV	c.A1379T	p.N460I	Cytochrome P450, E-class, group I;Cytochrome P450 superfamily;Cytochrome P450;Cytochrome P450;Cytochrome P450;Cytochrome P450, conserved site;Cytochrome P450, conserved site;Cytochrome P450, conserved site;Cytochrome P450, conserved site;Cytochrome P450, conserved site;Cytochrome P450, conserved site;Cytochrome P450 superfamily
TWF1043	EYR41_005196	scaffold_3	1505468	1505468	-	TA	stopgain	c.3945_3946insTA	p.G1316_L1317delinsX	MFS transporter superfamily;MFS transporter superfamily;Protein of unknown function DUF3645;Protein of unknown function DUF3638;Protein of unknown function DUF3638;Protein of unknown function DUF3638;Protein of unknown function DUF3638;Protein of unknown function DUF3638;Protein of unknown function DUF3638;Protein of unknown function DUF3638
TWF1044	EYR41_001672	scaffold_1	5482974	5482974	G	A	unknown	UNKNOWN	UNKNOWN	P:chromatin silencing; C:SHREC complex
TWF1044	EYR41_008187	scaffold_5	1734131	1734131	A	G	nonsynonymous SNV	c.A128G	p.E43G	Mitochondrial pyruvate carrier;Mitochondrial pyruvate carrier;Mitochondrial pyruvate carrier;Mitochondrial pyruvate carrier;Mitochondrial pyruvate carrier;Mitochondrial pyruvate carrier
TWF1044	EYR41_008758	scaffold_5	3610794	3610794	T	C	nonsynonymous SNV	c.A218G	p.N73S	F:protein binding; C:eisosome; P:eisosome assembly
TWF1045	EYR41_000505	scaffold_1	1607457	1607457	C	T	nonsynonymous SNV	c.C683T	p.S228F	zinc finger C2H2 superfamily;zinc finger C2H2-type;zinc finger C2H2-type;zinc finger C2H2-type;zinc finger C2H2-type;zinc finger C2H2-type;zinc finger C2H2-type;zinc finger C2H2-type;zinc finger C2H2-type;zinc finger C2H2-type;zinc finger C2H2-type;zinc finger C2H2-type;zinc finger C2H2-type;zinc finger C2H2-type;zinc finger C2H2-type;zinc finger C2H2-type;zinc finger C2H2-type;zinc finger C2H2-t…
TWF1045	EYR41_003703	scaffold_2	3845062	3845062	T	C	nonsynonymous SNV	c.T1282C	p.C428R,EYR41_003703	JmjC domain;JmjC domain;Methyltransferase Ppm1/Ppm2/Tcmp;Methyltransferase Ppm1/Ppm2/Tcmp;Methyltransferase Ppm1/Ppm2/Tcmp;Kelch-type beta propeller;Kelch-type beta propeller;Kelch-type beta propeller;Kelch-type beta propeller;JmjC domain;galactose oxidase/kelch, beta-propeller;galactose oxidase/kelch, beta-propeller;S-adenosyl-L-methionine-dependent methyltransferase
TWF1045	EYR41_006283	scaffold_3	4901525	4901525	T	A	nonsynonymous SNV	c.A2066T	p.Y689F	Protein of unknown function DUF3435;Protein of unknown function DUF3435;Protein of unknown function DUF3435;Protein of unknown function DUF3435;Protein of unknown function DUF3435;Protein of unknown function DUF3435
TWF1045	EYR41_006494	scaffold_4	232544	232544	A	T	stopgain	c.A682T	p.K228X	Protein of unknown function DUF3292;Protein of unknown function DUF3292;proteasome component (PCI) domain;26S proteasome regulatory subunit Rpn7/COP9 signalosome complex subunit 1;26S proteasome regulatory subunit Rpn7/COP9 signalosome complex subunit 1;proteasome component (PCI) domain;proteasome component (PCI) domain;COP9 signalosome complex subunit 1;COP9 signalosome complex subunit 1;proteas…
TWF1046	EYR41_000573	scaffold_1	1841288	1841288	T	C	nonsynonymous SNV	c.A3773G	p.Q1258R	F:protein binding
TWF1046	EYR41_002232	scaffold_10	22812	22812	T	G	nonsynonymous SNV	c.A692C	p.Y231S	no GO terms
TWF1046	EYR41_002550	scaffold_2	125281	125281	A	G	nonsynonymous SNV	c.T268C	p.F90L	Protein kinase-like domain superfamily;Protein kinase-like domain superfamily;Protein kinase-like domain superfamily
TWF1046	EYR41_002949	scaffold_2	1399663	1399663	A	G	nonsynonymous SNV	c.T1955C	p.L652S	DNA mismatch repair protein MutS, core domain superfamily;DNA mismatch repair protein MutS, core domain superfamily;G-patch domain;GC-rich sequence DNA-binding factor-like domain;G-patch domain;G-patch domain;G-patch domain;G-patch domain;G-patch domain;G-patch domain;G-patch domain;G-patch domain;G-patch domain;G-patch domain;G-patch domain;G-patch domain;G-patch domain
TWF1046	EYR41_003064	scaffold_2	1780257	1780257	A	C	stopgain	c.T1040G	p.L347X	Velvet domain;Velvet domain;Clathrin adaptor, alpha/beta/gamma-adaptin, appendage, Ig-like subdomain;VHS domain;GAT domain superfamily;GAT domain superfamily;ENTH/VHS;ENTH/VHS;GAT domain;VHS domain;Clathrin adaptor, alpha/beta/gamma-adaptin, appendage, Ig-like subdomain;Clathrin adaptor, alpha/beta/gamma-adaptin, appendage, Ig-like subdomain;Clathrin adaptor, alpha/beta/gamma-adaptin, appendage, …
TWF1046	EYR41_003629	scaffold_2	3539536	3539536	A	G	nonsynonymous SNV	c.A1151G	p.K384R	AMP-dependent synthetase/ligase;AMP-dependent synthetase/ligase;AMP-dependent synthetase/ligase;AMP-binding, conserved site;AMP-binding, conserved site;AMP-binding, conserved site
TWF1046	EYR41_003643	scaffold_2	3576727	3576727	A	G	nonsynonymous SNV	c.T1522C	p.Y508H	NOT2/NOT3/NOT5;CCR4-NOT complex subunit 2/3/5, N-terminal domain superfamily;CCR4-NOT complex subunit 2/3/5, N-terminal domain superfamily;CCR4-NOT complex subunit 2/3/5, N-terminal domain superfamily;CCR4-NOT complex subunit 2/3/5, N-terminal domain superfamily;CCR4-NOT complex subunit 2/3/5, N-terminal domain superfamily;CCR4-NOT complex subunit 2/3/5, N-terminal domain superfamily;CCR4-NOT com…
TWF1046	EYR41_006451	scaffold_4	56311	56311	C	T	stopgain	c.G150A	p.W50X	P-loop containing nucleoside triphosphate hydrolase;P-loop containing nucleoside triphosphate hydrolase;P-loop containing nucleoside triphosphate hydrolase
TWF1046	EYR41_007108	scaffold_4	2053723	2053723	A	C	stopgain	c.T17G	p.L6X	no GO terms
TWF1046	EYR41_008081	scaffold_5	1394127	1394127	T	C	nonsynonymous SNV	T2164C	p.S722P	P:phosphorelay signal transduction system
TWF1046	EYR41_010493	scaffold_7	1849994	1849994	A	T	nonsynonymous SNV	c.A34T	p.I12F	Domain of unknown function DUF2183;Domain of unknown function DUF2183;Domain of unknown function DUF2183;Domain of unknown function DUF2183;Domain of unknown function DUF2183;Domain of unknown function DUF2183;Domain of unknown function DUF2183;Domain of unknown function DUF2183;Domain of unknown function DUF2183
TWF1046	EYR41_011354	scaffold_8	1616480	1616480	A	G	nonsynonymous SNV	c.T95C	p.L32P	F-box domain;F-box domain
TWF1046	EYR41_003930	scaffold_2	4529863	4529863	T	-	frameshift deletion	c.1646delT	p.L549fs	Pre-mRNA polyadenylation factor Fip1-like;Pre-mRNA polyadenylation factor Fip1-like;Pre-mRNA polyadenylation factor Fip1-like;Pre-mRNA polyadenylation factor Fip1-like;Pre-mRNA polyadenylation factor Fip1-like;Pre-mRNA polyadenylation factor Fip1-like;Pre-mRNA polyadenylation factor Fip1-like
TWF1046	EYR41_004129	scaffold_2	5205470	5205470	T	-	frameshift deletion	c.674delT	p.L225fs	Pyridoxal phosphate-dependent transferase, major domain;Pyridoxal phosphate-dependent decarboxylase;Pyridoxal phosphate-dependent transferase, major domain;Pyridoxal phosphate-dependent transferase, major domain;Pyridoxal phosphate-dependent transferase, major domain;Pyridoxal phosphate-dependent transferase
TWF1073	EYR41_000404	scaffold_1	1299087	1299087	T	C	nonsynonymous SNV	c.T830C	p.L277S	Phosphoribosylglycinamide synthetase, C-domain;Phosphoribosylglycinamide synthetase, C-domain;PurM-like, N-terminal domain;PurM-like, N-terminal domain superfamily;Phosphoribosylglycinamide synthetase, ATP-grasp (A) domain;Phosphoribosylglycinamide synthetase, ATP-grasp (A) domain;PurM-like, C-terminal domain superfamily;Phosphoribosylformylglycinamidine cyclo-ligase;ATP-grasp fold, subdomain 1;P…
TWF1073	EYR41_009854	scaffold_6	3306838	3306838	T	G	nonsynonymous SNV	c.T770G	p.L257R	F:magnesium ion binding; F:catalytic activity; F:pyruvate kinase activity; P:glycolytic process; F:potassium ion binding
TWF1073	EYR41_009854	scaffold_6	3306844	3306844	G	A	nonsynonymous SNV	c.G776A	p.G259E	F:magnesium ion binding; F:catalytic activity; F:pyruvate kinase activity; P:glycolytic process; F:potassium ion binding
TWF1073	EYR41_011448	scaffold_8	1893855	1893855	C	T	nonsynonymous SNV	c.G1523A	p.G508E	Tetratricopeptide-like helical domain superfamily;Tetratricopeptide-like helical domain superfamily;Class I glutamine amidotransferase-like;Anthranilate synthase/para-aminobenzoate synthase like domain;Glutamine amidotransferase;Indole-3-glycerol phosphate synthase;Anthranilate synthase component 2;Aldolase-type TIM barrel;N-(5'phosphoribosyl) anthranilate isomerase (PRAI);Aldolase-type TIM barre…
TWF1073	EYR41_002828	scaffold_2	982255	982255	-	TGATCTGGTCCGGCCGGTAAGTTTGCGCCAGCCGCTGGCCGCTGAACAGCCAGGCCTGCACCCGGTCGTTCCAGCGTGACATGGCCCACAGCACCTTATCCACCCGATCGCCGTCTTGCAGGTTGCA	stopgain	c.676_677ins	p.D226_A227delinsVIWSGRX	P:proteolysis; F:cysteine-type peptidase activity
TWF1073	EYR41_003068	scaffold_2	1791877	1791878	AA	-	frameshift deletion	c.299_300del	p.V100fs	P:phosphatidylinositol biosynthetic process; C:PAS complex
TWF1073	EYR41_003068	scaffold_2	1791880	1791880	A	-	frameshift deletion	c.297delT	p.H99fs	P:phosphatidylinositol biosynthetic process; C:PAS complex
TWF1073	EYR41_003068	scaffold_2	1791881	1791881	-	GC	frameshift insertion	c.295_296insGC	p.H99fs	P:phosphatidylinositol biosynthetic process; C:PAS complex
TWF1073	EYR41_003068	scaffold_2	1791888	1791888	-	GGG	nonframeshift insertion	c.288_289insCCC	p.R97delinsPR	P:phosphatidylinositol biosynthetic process; C:PAS complex
TWF1073	EYR41_003672	scaffold_2	3640379	3640379	-	CGTAGCCGCCAGAAGTCCAGCAGCGGCCCGGTGGCGAAGGCAGCGAACTGCGTTTCACGCGTTAACCAGTCATCGGAGCTGAGAGTGAACGAGGTCATCGAGAGCGTTTTCCCTGTGGGGCCGGCGGAAA	stopgain	c.989_990insTTTCCGCCGGCCCCACAGGGAAAACGCTCTCGATGACCTCGTTCACTCTCAGCTCCGATGACTGGTTAACGCGTGAAACGCAGTTCGCTGCCTTCGCCACCGGGCCGCTGCTGGACTTCTGGCGGCTACG	p.M330_E331delinsIFRRPHRENALDDLVHSQLRX
TWF1073	EYR41_007480	scaffold_4	3310650	3310650	-	GCATTTCACCCGAATGGCGCCG	frameshift insertion	c.3166_3167insGCATTTCACCCGAATGGCGCCG	p.C1056fs	F:protein binding
TWF1073	EYR41_007480	scaffold_4	3310655	3310655	-	TTGTTGCCCGGCGACGCTGGTTGCGGTGCTGAGAAAATACAGCGTGCCGAAATTCAGCGTGCCGAAGCTGACATTGCCGCCTGAGCTGCTGCCGGCCTCA	stopgain	c.3171_3172insTTGTTGCCCGGCGACGCTGGTTGCGGTGCTGAGAAAATACAGCGTGCCGAAATTCAGCGTGCCGAAGCTGACATTGCCGCCTGAGCTGCTGCCGGCCTCA	p.V1057_Q1058delinsVLLPGDAGCGAEKIQRAEIQRAEADIAAX	F:protein binding
TWF1073	EYR41_007677	scaffold_4	3963420	3963421	TA	-	frameshift deletion	c.64_65del	p.Y22fs	no IPS match
TWF1073	EYR41_008113	scaffold_5	1510938	1510938	-	GTTTTTCCGCAGCGTGCCGGAATTCGAAAAAATGCTGACGCGCAGCGGCATCCAAATCGTCAAATATTGGTTTTCGATCACCGATGACGAGCAGGAGCTGCGGTTCCTCAGCCGCATTCACGATCCGC	frameshift insertion	c.5144_5145insGTTTTTCCGCAGCGTGCCGGAATTCGAAAAAATGCTGACGCGCAGCGGCATCCAAATCGTCAAATATTGGTTTTCGATCACCGATGACGAGCAGGAGCTGCGGTTCCTCAGCCGCATTCACGATCCGC	p.D1715fs	F:protein binding
TWF1073	EYR41_009423	scaffold_6	1959873	1959873	-	GCGAAAA	frameshift insertion	c.594_595insGCGAAAA	p.T198fs	no GO terms
TWF1073	EYR41_009423	scaffold_6	1959877	1959877	-	GGCCTTGCCGCTGGCGCAGGGCAAAAGCGTAACCTGGACGGTGCAGAACCCGCACGGGCTGCATGCGCGCCCGGCGGCGCGGCTGGTCGAGACGCTGGCGCCGTTCAAGGCCGAGC	stopgain	c.598_599insGGCCTTGCCGCTGGCGCAGGGCAAAAGCGTAACCTGGACGGTGCAGAACCCGCACGGGCTGCATGCGCGCCCGGCGGCGCGGCTGGTCGAGACGCTGGCGCCGTTCAAGGCCGAGC	p.L200_I201delinsWPCRWRRAKAX	F:lipid binding
TWF1073	EYR41_009854	scaffold_6	3306798	3306798	-	TCGAAGAAGTGA	nonframeshift insertion	c.730_731insTCGAAGAAGTGA		F:magnesium ion binding; F:catalytic activity; F:pyruvate kinase activity; P:glycolytic process; F:potassium ion binding
TWF1073	EYR41_009854	scaffold_6	3306804	3306806	ATG	-	nonframeshift deletion	c.736_738del	p.246_246del	F:magnesium ion binding; F:catalytic activity; F:pyruvate kinase activity; P:glycolytic process; F:potassium ion binding
TWF1073	EYR41_009854	scaffold_6	3306841	3306841	-	G	frameshift insertion	c.773_774insG	p.A258fs	F:magnesium ion binding; F:catalytic activity; F:pyruvate kinase activity; P:glycolytic process; F:potassium ion binding
TWF1073	EYR41_009854	scaffold_6	3306849	3306849	C	-	frameshift deletion	c.781delC	p.P261fs	F:magnesium ion binding; F:catalytic activity; F:pyruvate kinase activity; P:glycolytic process; F:potassium ion binding
TWF1073	EYR41_010056	scaffold_7	304774	304774	-	GTATGGCTGAATGGGTAAACGGCAAAGTTACGCAGGTAAAACAATGGACCGACGGGCTGTTCAGCCTGGTGGTCAATGCCCCCATCGATC	stopgain	c.63_64insGATCGATGGGGGCATTGACCACCAGGCTGAACAGCCCGTCGGTCCATTGTTTTACCTGCGTAACTTTGCCGTTTACCCATTCAGCCATAC	p.S22delinsDRWGHX	P:DNA repair; P:DNA dealkylation involved in DNA repair; F:oxidoreductase activity; P:oxidative single-stranded DNA demethylation; F:dioxygenase activity; P:oxidation-reduction process
